1  
2  
3  
4  
5  
6  
7  
8  
9  
10  
11  
12  
13  
14  
15  
16  
17  
18  
19  
20  
21  
22

Full title:

A randomised exploratory investigation of the effects of Attention vs Working Memory  
Training on cognitive performance and everyday functioning following stroke.

Short title:

Cognitive training in stroke.

Polly V Peers<sup>1</sup>

Duncan E Astle<sup>1</sup>

John Duncan<sup>1</sup>

Fionnuala Murphy<sup>1</sup>

Adam Hampshire<sup>2</sup>

Tilak Das PhD<sup>3</sup>

Tom Manly<sup>1</sup>

<sup>1</sup>MRC Cognition and Brain Sciences Unit, University of Cambridge, Cambridge, UK

<sup>2</sup>Division of Brain Sciences, Department of Medicine, Imperial College London, London, UK

<sup>3</sup>Department of Radiology, Cambridge University Hospitals NHS Trust, Cambridge, UK

Clinical trial registered at <http://www.isrctn.com/ISRCTN11489327>

## 23 Abstract

24 Difficulties with attention are common following stroke and are associated with poor  
25 outcome. Home-based online cognitive training may have to the potential to provide an  
26 efficient and effective way to improve attentional functions in such patients. Little work has  
27 been carried out to assess the efficacy of this approach in stroke patients, and the lack of  
28 studies with active control conditions and rigorous evaluations of cognitive functioning pre  
29 and post training means understanding is limited as to whether and how such interventions  
30 may be effective. Here we compare the effects of 20 days of active cognitive training using  
31 either novel Selective Attention Training (SAT) or commercial Working Memory Training  
32 (WMT) programme , versus a waitlist control group, on a wide range of attentional and  
33 working memory tasks, as well as on self-reported everyday functioning. We demonstrate  
34 separable effects of each of the active training conditions, with SAT leading to improvements  
35 in both spatial and non-spatial aspects of attention and WMT leading to improvements only  
36 on very closely related working memory tasks. Both training groups reported improvements  
37 in everyday functioning, which were associated with improvements in attentional functions,  
38 suggesting that improving attention may be of particular importance in maximising functional  
39 recovery in this patient group.

40

41

42

43

44

## 45 Introduction

46 Stroke is the leading cause of long-term disability in the UK and other developed nations,  
47 with high costs for health and care provision [1]. It can result in persistent physical, cognitive  
48 and mood impairments. Whilst the pattern of cognitive impairment will vary according to  
49 factors such as lesion extent and location, some presentations are particularly common.

50 Impaired attention has been reported in up to 92% of stroke survivors in the acute stage [2]  
51 and to persist in up to 50% in the longer-term [3,4]. There are many reasons to think that  
52 attention – including our ability to detect errors and to remain focused on activities – would  
53 be critical skills in maximising functional recovery. Indeed capacity to sustain attention 2  
54 months after stroke is a stronger predictor of motor recovery over the following two years  
55 than the level of physical impairment in the acute stage [5]. Similarly attentional functioning  
56 has also been linked to recovery of other functions such as language [6]. Moreover  
57 attentional deficits that impact spatial awareness (particularly unilateral neglect) are  
58 associated with high levels of disability, poor outcome, and increased reliance on public  
59 services [7,8].

60 Perhaps due to its striking presentation (including failure to eat food from half the plate, or  
61 dress one side of the body) and link to poor outcome, much of the focus on rehabilitation of  
62 attentional difficulties has focussed on trying to reduce the spatial difficulties seen in patients  
63 with unilateral neglect. Interventions specifically aimed at ameliorating the spatial bias  
64 observed in these patients, including adaptation to prism lenses [9], hemifield patching [10]  
65 and training in visual scanning [11], have had some impact. However a Cochrane review  
66 [12], concluded that there was insufficient evidence of generalised, persistent gains to  
67 currently recommend any intervention.

68 Given the strong evidence that attentional impairments may be key to maximising functional  
69 recovery, and that spatial interventions have not given rise to generalised persistent  
70 improvements in patients, could training non-spatial aspects of attention be beneficial? A  
71 potentially different approach to the rehabilitation of attentional impairments is informed by  
72 observations pathological spatial biases are observable in a large proportion of patients with  
73 unilateral brain lesions (not just patients with neglect) and that these spatial biases tend to  
74 arise and persist in the context of more general (not specifically *lateralised*) attentional  
75 impairments [13,14,15,16,17]. Additionally, interventions that temporarily manipulate  
76 general attentional resources during assessment of attentional functions, for example  
77 increasing alertness via stimulants or stimulation [18, 19] or reducing alertness with sleep  
78 onset [20], have been shown to phasically modulate spatial bias, suggesting rather direct  
79 interactions between these components. Despite not explicitly targeting spatial bias,  
80 therefore, it may be possible to improve spatial functions by focussing on other aspects of  
81 attention.

82 The distinction between lateralised and non-lateralised aspects of attention is perhaps best  
83 illustrated by computational models of normal attention, such as Bundesen's Theory of  
84 Visual Attention (TVA)[21]. Within the framework of TVA a number of separable, but  
85 interacting components can be derived from data collected in a simple partial and whole  
86 report paradigm in which participants are requested to report the identities of very briefly  
87 reported letters of a target colour (for example black) whilst ignoring letters that may  
88 simultaneously appear in a distracting colour (say white). Some components such as visual  
89 capacity ( $K$ , how many letters can be taken in 'at a glance') and attentional selection ( $\alpha$ , the  
90 degree to which the target color can be used to exclude the influence of non-target letters) are  
91 essentially non-spatial in nature. In addition the paradigm allows for computation of a  
92 distinct component of 'spatial bias' (a systematic bias towards/away from letters on one side

93 of the display). Data from patient groups who have undertaken such assessment indeed  
94 confirm the link between spatial bias and more general attention capacity limitations  
95 [14,15,16]. An interesting and clinically highly relevant test of whether cognitive training of  
96 attention has generalised benefits is therefore whether gains are observed on measures of  
97 spatial bias despite patients being given no specific guidance in paying attention to the  
98 relatively neglected side of space.

99 There has been little scientific evaluation of the potential success of training specific  
100 cognitive functions following stroke (see [22,23] for exceptions). Westerberg et al., [23], for  
101 example, report positive findings from working memory training (WMT) suggesting  
102 improvements following training that appear to generalise to untrained tasks. The absence of  
103 an active control group, however, makes it impossible to rule out the possibility that these  
104 effects reflect the general benefit of being involved in any intervention, or participants'  
105 expectations. Johansson, & Tornmalm [24], in contrast, detected improvements only on  
106 trained tasks. Here, in a proof-of-concept study, we ask whether computerised training,  
107 which focusses on improving attentional functions can produce specific, measurable changes  
108 in cognitive functioning and reduce disability in everyday life.

109 To this end we developed a novel Selective Attention Training (SAT) battery, consisting of  
110 five tasks developed to shape participants' ability to rapidly attentionally sift through  
111 onscreen stimuli for goal-relevant information. We intended to compare this with another,  
112 well established, cognitively demanding WMT battery, Cogmed™. Working memory can be  
113 conceived as the operation of two specific, capacity/time limited, information stores (verbal  
114 and visuo-spatial) and a more general 'central executive' component required in many  
115 attentionally demanding activities [25]. In as much as WMT enhances capacity or efficiency  
116 of this central component, it provides a good comparison to our attentional training, with the

117 potential to lead to improvements in attention though structurally dissimilar tasks to those  
118 developed in our SAT. WMT has been studied extensively, mainly in developmental  
119 populations. Some studies show gains which may stem from changes within the attentional  
120 control system [26,27] whilst others show that these improvements extend only to tasks that  
121 are similarly structured to those practised during training [28], suggesting that, in children at  
122 least, task-specific strategies, rather than generalised attentional improvements, may account  
123 for the behavioural gains made.

124 Whilst generalisation remains highly questionable within the developmental literature [29,30]  
125 there are grounds to believe that the case of stroke patients may be very different.  
126 Importantly, whilst school-aged children are exposed to hours of structured mental  
127 stimulation and feedback in the class-room each day, stroke patients in the community do not  
128 receive such stimulation, or feedback, which may be crucial to learning or relearning  
129 cognitive skills.

130 Taking the lead from the Cogmed WMT battery, we produced our SAT to share many of the  
131 features that have shown promise in WMT. Both forms of training are adaptive (becoming  
132 progressively more difficult as performance improves, and easier if performance is poor),  
133 allowing patients to progress at their own rate. Improvements in performance are rewarded  
134 with points, melodic flourishes or spoken feedback. Both forms of training employ varied,  
135 relatively brief tasks, using colourful displays, and provide trial-by-trial feedback to assist  
136 with learning.

137 Cognitive training could produce general benefits that are unspecific to the training tasks (e.g.  
138 structured daily reinforced cognitive practice, sense of confidence and mastery, general  
139 expectation effects and so forth). Comparing two forms of cognitive training provides the  
140 potential to examine both specific cognitive effects and general benefits of training (assuming

141 a wide-ranging evaluation of cognitive functioning pre and post training is carried out to  
142 determine whether differential effects of each training paradigm are observed). To this end  
143 we randomly allocated patients with likely difficulties in attention following stroke to a  
144 WMT, SAT or WL condition. An extensive range of outcome measures assessing working  
145 memory, attention, spatial bias, and self-report everyday function were completed before and  
146 after 4-weeks of daily training (or equivalent waitlist period). To increase power, WL  
147 participants were then randomised to one or other form of training, with their post-WL  
148 assessment acting as the baseline for subsequent post-training reassessment. A further benefit  
149 of having these carefully matched training regimes, in combination with a range of  
150 theoretically motivated cognitive outcome measures is that it allows us to start to explore the  
151 potential mechanisms by which any improvements in cognitive function have occurred.

152 Logically three potential outcomes could be predicted, which would lead to different  
153 conclusions about associated mechanisms. Firstly, neither training regime could be  
154 associated with improvements on the outcome measures compared with the WL control. This  
155 would question whether any form of training could be effective, or whether this null finding  
156 could be due to ‘dose’ or insensitivity of the outcome measures. Secondly, both forms of  
157 training could produce equivalent general benefits compared with WL suggesting common  
158 mechanisms which could potentially be due to motivational or social influences as opposed to  
159 training specific cognitive abilities. Finally each form of training could produce its own  
160 profile of cognitive improvements suggesting mechanisms that are, at least in part, specific to  
161 each form of training. For example one might expect to find the greatest effects of WMT on  
162 working memory measures and conversely the greatest effects of SAT on attention measures.  
163 Finally, given the importance of attention for outcome in stroke, we have included a measure  
164 of everyday function to examine whether specific improvements in cognitive function  
165 influence everyday functioning.

166 Materials and methods

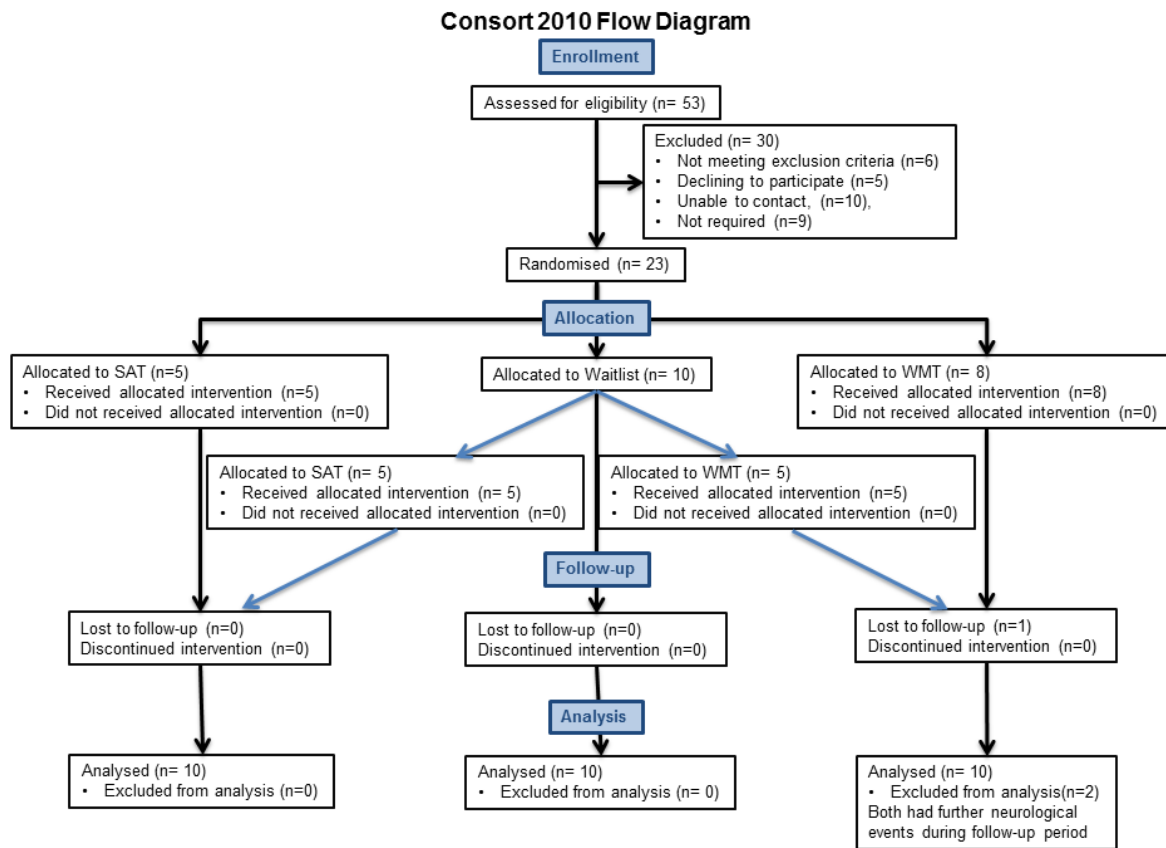

167

168 Figure 1. Consort flow diagram showing the progression of participant's through the study

169 Participants

170 Twenty-three participants from the Cambridge Cognitive Neuroscience Research Panel  
171 (CCNRP) gave informed, written consent for their participation in the study. The CCNRP is a  
172 database of volunteers who have historically suffered a brain lesion from various causes, and  
173 who have expressed an interest in participating in research. Twenty had right-hemisphere  
174 stroke, 2 left hemisphere stroke, and 1 had bilateral damage. All were chronic patients (mean  
175 time since injury 8.5 years, SD 4.7 years, range 7 months-17 years), aged under seventy-five  
176 years (mean 59 years, SD 10.6 years, range 28-74 years) and had no history of other



177 neurological conditions. The recruitment of these patients with chronic lesions enabled us to  
178 collect outcome data on a wide-range of demanding, theoretically motivated, outcome  
179 measures to allow us to effectively assess the impact of training, minimising the issues of  
180 fatigue and daily fluctuations in ability often observed in acute patients. Patients were  
181 selected without knowledge of their behavioural difficulties, but on the basis that they had  
182 large lesions. Most had suffered middle cerebral artery (MCA) strokes, or had a lesion in  
183 areas of frontal and parietal cortices that have been linked to poor attention functioning (see  
184 Figure 2 for lesion overlays for the 10 patients for whom MRI scans were available). All had  
185 normal or corrected to normal visual acuity and sufficient language to comprehend and  
186 respond appropriately to the task demands and to provide informed consent. Although a  
187 number of the patients had substantial motor impairments they were able to make required  
188 responses (even if sometimes with their non-dominant hand) where these were required. The  
189 study was approved by the Cambridge Psychology Research Ethics Committee. Participants  
190 received a small honorarium for their time. The first patient entered the study on 15<sup>th</sup> March  
191 2013 and the last patient completed the study on 17<sup>th</sup> September 2014.

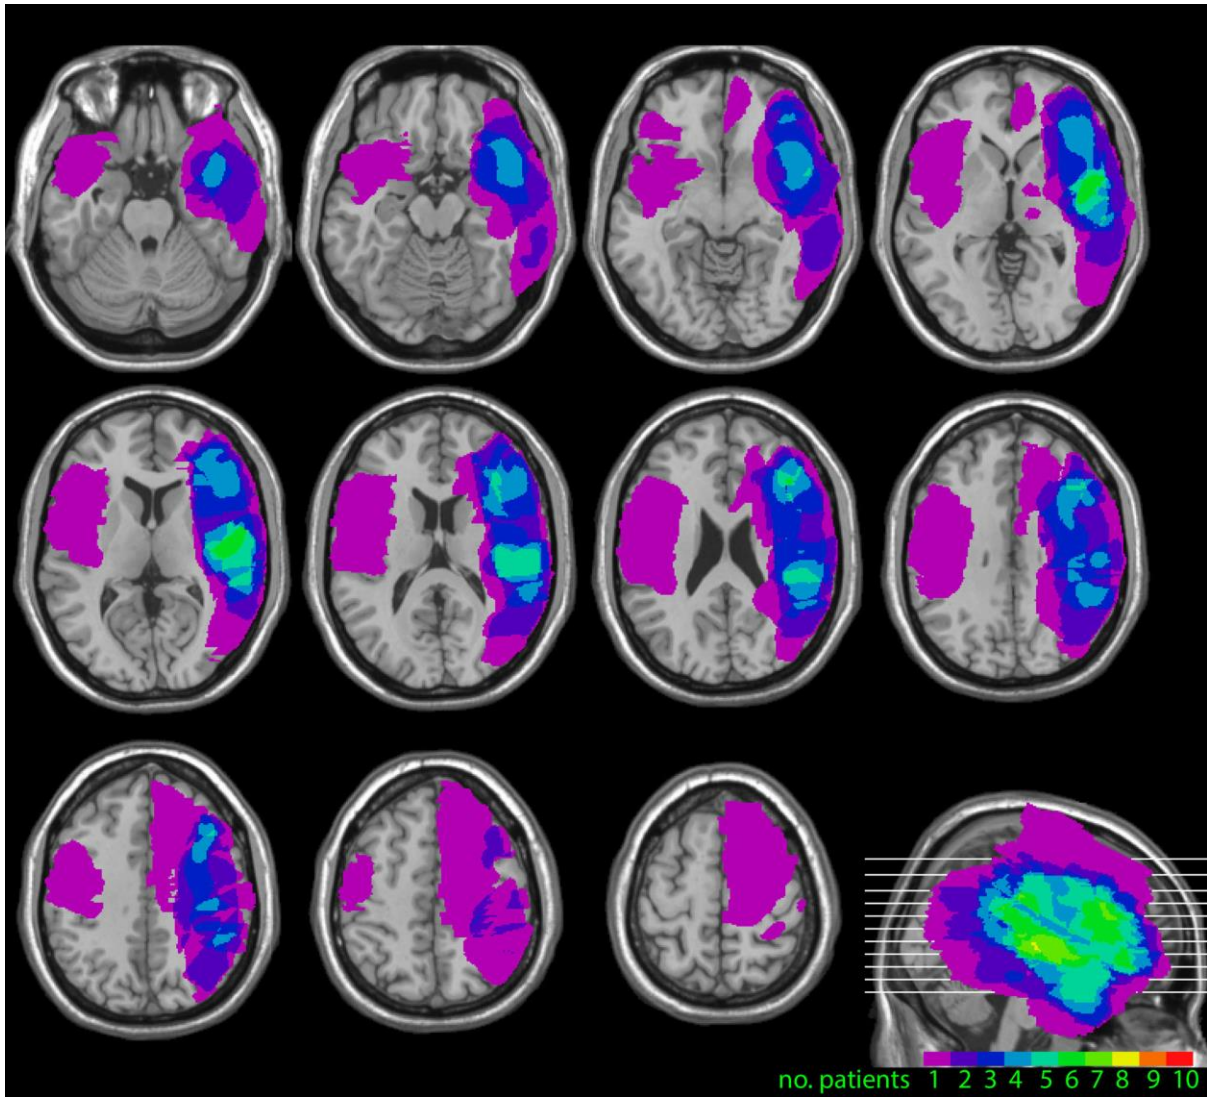

193

Figure 2. Lesion overlays for 10 of the 23 patients in the study, for whom scans were available.

194

These show the foci of the lesions in frontal, parietal and temporal cortices predominantly in the

195

right hemisphere.

196

## 196 Procedure

197

Prior to their first assessment session participants were randomised into one of three

198

conditions: WMT, SAT, or WL. At this time, the WL patients were further randomised to

199

WMT or SAT to be completed at the end of the WL period. The entire randomisation

200

sequence was completed by PP prior to the recruitment of the first participant and then

200

201 subject numbers (and their corresponding conditions) were allocated by PP in a sequential  
202 order to participants as they became available without any prior knowledge of the individual.  
203 After completing their initial assessment in their own homes, participants in training  
204 conditions were shown how to log in to the relevant websites and navigate through the tasks.  
205 They were asked to try and complete the training each weekday for the next 4 weeks (20  
206 sessions). Participants were encouraged to get in touch with the project team if they  
207 experienced any difficulties accessing the tasks. In addition a weekly phone call was  
208 scheduled with a member of the research team in which participants could discuss any  
209 difficulties and their general progress. Because the research team received a log of each  
210 participant's use of the programs, where repeated sessions were missed this could be brought  
211 up in the conversation, enquiring whether there were particular barriers, whether the  
212 participant had forgotten about the training and so on. If necessary we allowed longer than 4  
213 weeks for participants to complete 20 sessions. All training sessions were completed in  
214 participants' homes, for all but one on the participant's home computer. WL patients also  
215 had a weekly phone call from the research team during their wait period in which they were  
216 asked similar questions about progress (but not about training). After the 2<sup>nd</sup> assessment,  
217 when the Waitlist participants began training they received the same level of support  
218 described above.

#### 219 Pre-training assessment session

220 Participants received an extensive assessment of their cognitive profile and everyday  
221 functioning at each of the assessments. The measures focussed predominantly on attention  
222 and memory functioning and included both measures taken from basic science as well as  
223 those typically used to assess function in the clinic.

224 ***Background assessments***

225 Participants completed a number of standard assessments including the Sloan Letter Near  
226 Vision Card (Good-lite Co, IL) to assess visual acuity, and the Tests for Colour-Blindness  
227 [31]. All patients had normal, or corrected to normal, visual acuity and all but one was found  
228 to have normal colour vision. The National Adult Reading Test (NART) [32] was used to  
229 estimate premorbid IQ and the Cattell Culture Fair Test [33] was used to estimate current  
230 fluid IQ.

231 ***Attention measures***

232 *Partial and Whole Report TVA paradigm.* This test, based on tasks extensively used in many  
233 studies [14,15] and see [34] for review, was used to assess the attention parameters of spatial  
234 bias, attentional selection ( $\alpha$ ) and visual short-term memory capacity (VSTM) operationalised  
235 in TVA [21]. This task required participants to verbally report the identities of as many letters  
236 of a pre-specified target colour (either black or white) as they could from arrays of briefly  
237 presented targets and non-targets, whilst maintaining central fixation. Each trial followed  
238 essentially the same pattern. An initial red fixation cross flashed on and off a grey  
239 background at a rate of between 150 and 230 ms four times. An array of letters was then  
240 presented along with the fixation cross for 150ms before being replaced by the fixation cross  
241 alone until the experimenter had recorded all the participant's responses and initiated the next  
242 trial. The arrays comprised of letters approximately 2 degrees by 3 degrees arranged in a  
243 circle approximately 10° radius about the central fixation cross. Letters were selected at  
244 random from the set B,C,D,F,G,H,J,K,L,N,P,Q,R,S,T,U,V,X,Y,Z, and were presented in  
245 either black or white. Three basic types of array were presented; 1.3 *targets (3T)* Unilateral  
246 presentation of three letters (in the target colour) to either the left or the right of fixation. 2. 3  
247 *targets 3 non-targets (3T3NT)* Presentation of three target letters on one side of the screen

248 with three non-targets (in the opposite colour) appearing on the other side of the fixation  
249 cross. 3. 6 targets (6T) Presentation of six letters in the target colour, three to the left, and  
250 three to the right, of fixation. From these conditions, 3 separable attentional parameters  
251 (closely related to those defined in TVA, but using simplified formulae) were defined:

252 • *Absolute spatial bias*; the relative extent to which performance is preserved on a  
253 particular side of space in the presence of competing target information on the other  
254 side of space. To examine this, we compared relative reduction in performance  
255 between the 3T and 6T conditions for items presented on the left versus right sides of  
256 space, using the following formula:

$$\text{Absolute spatial bias} = \text{ABS } 0.5 - \left( \frac{(pcorr\ 6T_{left}/pcorr\ 3T_{left})}{(pcorr\ 6T_{left}/pcorr\ 3T_{left}) + (pcorr\ 6T_{right}/pcorr\ 3T_{right})} \right)$$

257 Where *pcorr* is the proportion of targets correctly identified in that condition.

258 • *Top Down Control* ( $\alpha'$ ); the extent to which distracting (non-target) information can  
259 be ignored. Here we examine where the performance in the 3T3NT condition lies  
260 between the 3T condition and the 6T condition using the formula below. If  
261 participants have very good selection (lower values of  $\alpha'$ ), the non-targets should have  
262 relatively little impact whilst higher values of  $\alpha'$  indicate poorer attentional control.

$$\alpha' = \frac{(pcorr\ 3T + pcorr\ 6T)}{(2 \times pcorr\ 3T3NT)}$$

263 • *Visual Short-Term Memory Capacity* ( $K'$ ); the maximum number of letters that can be  
264 reported from a brief display of letters. Following standard practice, we use  
265 probability mixtures of the maximum and 1- maximum performance. In this case  $m$  is

266 the maximum number of letters ever reported (in the 6 target condition), and  $6T_m$  is  
267 the number of trials in which the participant correctly reported  $m$  letters.

$$K' = \left( m \times \frac{6T_m}{6T_m + 6T_{m-1}} \right) + \left( (m - 1) \times \frac{6T_{m-1}}{6T_m + 6T_{m-1}} \right)$$

268 • *Variability*. In addition to the three traditionally measured TVA parameters an  
269 additional measure of participants' variability in performance was derived. Variability  
270 in performance is thought to be indicative of poor sustained attention, which has also  
271 been linked to poor spatial awareness [35,36]. This was defined as the coefficient of  
272 variation (standard deviation divided by the mean) of correct letter reports from the  
273  $6T$  condition.

274 Participants completed 4 blocks of 60 trials, two towards the start of the experimental session  
275 and two towards the end of the experimental session.

276 In addition to the TVA paradigm, participants completed 5 other computerised versions of  
277 attention measures that have either been used clinically or which have been shown to be  
278 sensitive to spatial bias in experimental studies. These were:

279 *Star Cancellation Task* [37]; a version of this well-known measure in which participants were  
280 asked to mark, using a stylus, all the small stars on a busy array of small and large stars and  
281 letters scattered across the screen as quickly as they could. Patients with spatial neglect have  
282 a tendency to miss a disproportionate number of targets from one side of the display.

283 *Line Bisection Test*; in which participants were asked estimate and mark the mid-point of  
284 seven lines, between 11.5 and 15.2 cm in length, presented either centrally or to the left or  
285 right of the screen. The bisections of patients with spatial neglect can deviate markedly from  
286 objective centre suggesting that their awareness of one end of the line is impaired [38].

287 *A Temporal Order Judgment Task*; in which two boxes appeared to the left or right of  
288 fixation either simultaneously or with a variable delay in their onset. The participants' task is  
289 to judge which of the boxes appeared first. This version comprised 6 trials with simultaneous  
290 onsets and 2 trials with at each of 51ms, 102ms, and 500ms onset asynchronies respectively. It  
291 has been reported that patients with left spatial neglect performing a similar task required the  
292 left target to appear up to 500 ms ahead of the right target before accurately reporting the  
293 order [39].

294 *A Lateral Reaction Time Task*; in which participants pressed a central button as soon as they  
295 detected a target that could appear either to the left or right of fixation. Fourteen targets were  
296 presented with variable inter-target intervals, equal numbers appearing on the left and right.  
297 Absent, disproportionately slow and variable response times to targets in neglected space  
298 have been reported [40].

299 *Slow and Variable Tone Counting Test*; in this variant of a test of sustained attention  
300 participants must attend to and count a variable series of tones separated by long and  
301 unpredictable intervals. Performance on this test, which has no spatial requirement, has been  
302 reported to be particularly poor in patients with persistent spatial neglect [41].

### 303 ***Working Memory measures***

304 *Automated Working Memory Assessment (AWMA)* [42].

- 305 • *AWMA Dot Matrix Test*. In this computerised test a 4 x 4 grid was presented on the  
306 screen. The participant watched as a dot appeared at various locations on the grid and  
307 then recreated the sequence by pointing to the locations in the correct order. The test  
308 began with 2-location sequences and increased in sequence length until accuracy  
309 dropped below 50%.

310 • *AWMA Spatial Span Test*. Two abstract shapes were presented side by side on the  
311 screen. These could be identical or mirror images of one another, with the rightmost  
312 shape being presented in the upright position or rotated 120 or 240 degrees about the  
313 centre. With each presentation the participant had to determine whether the 2 shapes  
314 were the same or mirror images of one another. The shape on the right was always  
315 presented with a dot at one of three locations. At the end of a series of shape pairs the  
316 participant was asked to recall in order the locations of the dot on each pair. The test  
317 began with a single pair and increased the number of pairs until accuracy dropped  
318 below 50%.

### 319 *Self-reported Everyday Function measure*

320 *European Brain Injury Questionnaire (EBIQ)*[43]. This 63 item self-report questionnaire asks  
321 participants to rate their own function/symptoms over the preceding month. The items are  
322 grouped into nine broad categories; somatic symptoms, cognitive symptoms, motivation,  
323 impulsivity, depression, isolation, physical symptoms, communication issues and core  
324 symptoms, the latter being a global measure of disability.

325

### 326 Training

327 The training batteries were internet based and completed in participants' own homes.  
328 Following an initial induction they were completed without assistance from the research  
329 team. The batteries shared some essential core features, namely: that they were adaptive and  
330 therefore designed to keep patients working at their maximal ability, and that trial by trial  
331 feedback was given for both learning and motivational purposes.



332 *Working Memory Training (WMT)*. The adaptive version of the commercial Cogmed™  
333 Working Memory Training (Pearson; for full details see [www.cogmed.com/rm](http://www.cogmed.com/rm)) was used.  
334 Participants attempted 15 trials of 8 tasks in each session, covering both verbal and visuo-  
335 spatial working memory. Following the standard set-up, three of the twelve tasks in the  
336 battery were presented in every session, with the rest of each session being made up of five of  
337 the remaining nine tasks. Most participants completed a session of training in approximately  
338 30-50mins.

339 *Selective Attention Training (SAT)*. This training was designed by the research team and  
340 programmed in Flash using Adobe Flex Builder 3. They were deployed via a custom website  
341 (<https://www2.cbstrials.com>) developed in Ruby on Rails. The training consisted of five  
342 time-limited tasks designed to improve selective attention, comprising:

343 *Aliens Task*. In each trial an onscreen array of cartoon aliens appeared, one of which was  
344 designated as the target. The participant's task was to decide as quickly as possible whether  
345 another of the aliens was an exact match to the target, indicating a match/mismatch response  
346 by mouse clicking onscreen buttons (S1 Figure). All aliens were comprised of a combination  
347 of a head part, a body part and legs selected from four prototype heads, bodies and legs.  
348 These could vary along parameters such as the texture and thickness of arms and legs,  
349 number of eyes, the presence/absence of tail, hairstyles and clothing. With correct responses,  
350 task difficulty was increased by increasing the number of aliens in the array and their  
351 similarity to the target (requiring increasing attention to small distinguishing details). As with  
352 all of the SAT tasks, auditory and visual feedback was given for correct (a large green tick  
353 and a bell) and incorrect (a large red cross and a buzz) responses, progress was indicated by  
354 an onscreen thermometer and the remaining time for the task indicated with an onscreen  
355 digital clock. The duration of Aliens in each training session was 3 minutes.

356 *Visual Search.* In each trial an abstract shape was presented on the screen for a few seconds.  
357 It was then replaced by an array of objects (S2 Figure) and the participant was asked to judge  
358 whether any exactly matched the original shape. Difficulty was manipulated by increasing the  
359 similarity of the objects to the target along dimensions of shape, size, colour and texture. The  
360 task was played for 4 minutes on each training session.

361 *Jigsaw.* At the top of the screen two or more red boxes were shown each containing a distinct  
362 pattern or object (e.g. one with blue and white stripes, the other with an inverted grey  
363 triangle). In the lower part of the screen four or more white boxes also appeared, each with  
364 patterns or shapes. The participants' task was to decide whether the elements of each red box  
365 were present in the white boxes such that the 'jigsaw' could be made from these pieces (S3  
366 Figure). Difficulty was manipulated via the similarity of the elements in the boxes to the  
367 target configurations, the number of red boxes that needed to be matched and whether the  
368 elements in the white boxes needed to be mentally rotated to make up the patterns. The task  
369 was played for 4 minutes on each training session.

370 *Rotations.* This test required participants to take in the spatial relations between a series of  
371 shapes and then mentally rotate this image to judge whether it would match a second image  
372 (S4 Figure). In each trial two large squares were presented, each containing one or more  
373 smaller green or red squares (in effect, filled cells of an invisible identical grid). The  
374 participant's task was to indicate whether rotation of one large square and its elements would  
375 make it identical to the other. Difficulty was manipulated by the number of elements within  
376 the squares, the degree of rotation required and the similarity of the two squares (e.g. the  
377 elements being in very different locations compared to only one of many elements differing).  
378 Participants played the task for 3 minutes in each training session.

379 *Button Sorting.* On each trial of this set-shifting task a shape was presented upon which the  
380 participant was asked to make a speeded judgment based on a rule also presented on the

381 screen (S5 Figure). If the rule was ‘shape’ the participant had to indicate whether the shape  
382 most closely resembled a circle or square by clicking on an arrow pointing to one of two  
383 reference shapes (circle and square) that were coloured red and yellow (the color was  
384 irrelevant to the ‘shape’ rule). If the rule changed to ‘color’ the participant had now to click  
385 on the arrow pointing to the correct color and ignore the shape of the reference. Difficulty  
386 was increased by morphing the shapes in the direction of the alternate category (e.g.  
387 increasingly rounding off the square) and making the colors increasingly similar. Participants  
388 played the task for 4 minutes on each training session.

### 389 Post-training assessment

390 These sessions comprised the same tasks as the pre-test session without the background  
391 assessments. Sessions were scheduled to occur within 2 weeks of completing the online  
392 training, or the case of the WL, 4-6 weeks from their initial assessment.

393 The study was not blinded, and as an exploratory trial based on samples sizes reported in  
394 previous training studies on stroke patients, showing positive effects [23].

395 The study was not prospectively registered as a clinical trial as it was set up as an exploratory  
396 study to investigate whether training may be beneficial in a group of individuals who might  
397 be expected to have reduced attention, to see whether such an approach may have potential in  
398 a clinical sample. The primary interest of the study was to look at changes on experimental  
399 measures of attention and working memory. Of secondary interest was whether any  
400 improvements would transfer to changes in everyday life. All data collection was completed  
401 prior to the NIH publishing its definition of a clinical trial on 23<sup>rd</sup> October 2014. The authors  
402 confirm that all ongoing and related trials for these interventions are prospectively registered.

### 403 Results

404 Complete data were analysed from twenty of the twenty-three participants. Of those whose  
405 were omitted, two were removed having suffered subsequent neurological events between  
406 initial assessment and final assessment and one had to drop out owing to family  
407 circumstances. One-way ANOVAs were carried out to see whether the 3 groups differed on  
408 background measures. No significant differences between the groups were observed for age  
409 ( $F(2,29)=0.57$ ), time since injury ( $F(2,29)= 1.61$ ), visual acuity ( $F(2,29)=1.20$ ), NART ( $F$   
410 ( $2,29)= 1.37$ ) or Cattell ( $F(2,29)= 1.37$ ) suggesting the groups were well matched.

## 411 Training

### 412 *1 Compliance*

413 Compliance with the training program was generally good. All patients who started the  
414 training completed the study and on average the WMT group completed 19.8 of the intended  
415 20 sessions (range 18-20 sessions) whilst the SAT group completed 20.2 sessions (range 18-  
416 23). Patients were in regular contact with the research team (by phone or occasionally email)  
417 over the course of the training period. Participant feedback regarding the training was  
418 generally very positive. Nine participants requested to continue with training following their  
419 final assessment.

### 420 *2 Improvement on training tasks*

421 Mean performance by session data (collapsed across the three continuous Cogmed tasks, or  
422 all SAT tasks) for each of the training batteries are shown in Figure 3. Polynomial equations  
423 ( $y= x^2 + x+ c$ ) were fitted for each participant separately. These provided better fits than  
424 logarithmic fits and allow us to determine parameters including  $\delta y$  (the improvement in  
425 performance),  $\delta x$  (the number of sessions to maximal performance) and  $\delta y/\delta x$  (the average  
426 rate of improvement to asymptote). Polynomial fits were good, with a mean  $r^2$  of 0.76 (range

427 0.56-0.87) for the WMT group and 0.91 (range 0.68- 0.99) in the SAT group, for all but three  
428 patients. Data from these three patients with were therefore excluded from analyses of  
429 training gains, but not from analyses of outcome measures. Generally, the two training  
430 conditions appear to show a similar improvement profile with maximal performance achieved  
431 after 15.6 sessions (range 11.8- 18.8) and 16.6 sessions (range 13.25-23.54) for the WMT  
432 group and the SAT group respectively. Direct comparison of the improvements in the two  
433 training conditions were precluded by the different scales used. Nonetheless, the WMT group  
434 showed an average improvement of 2.7 items (range 1.2- 4.6) whilst the SAT group  
435 improved by 11.7 points (range 7.9- 16.1) indicating that all participants were able to  
436 demonstrate improved performance with training.

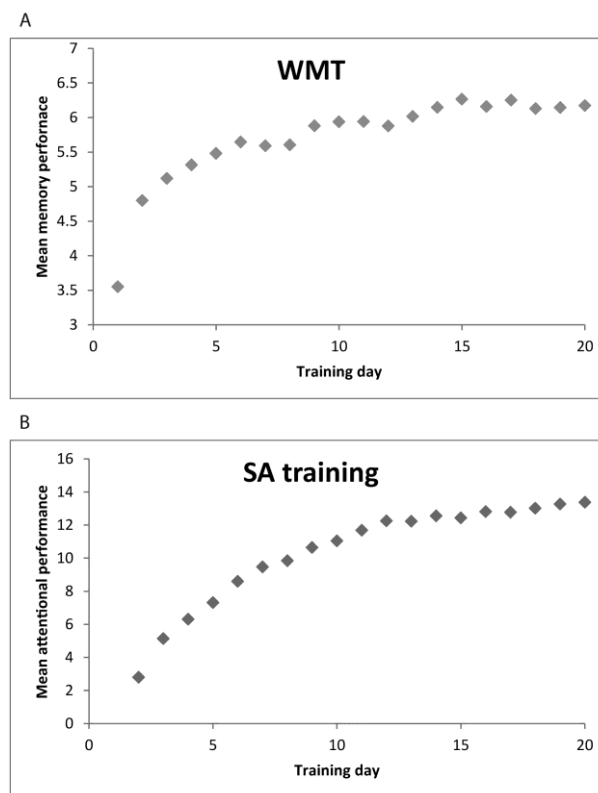

437

438 Figure 3. Average performance on the training tasks over the twenty days of training for (A) WMT  
439 and (B) SAT groups respectively

440 *3 Training transfer*

441 Having demonstrated that participants generally improved on the training tasks, we next  
442 established whether these improvements transferred to other cognitive tasks and measures of  
443 disability. For all subsequent analyses a regression approach was used to examine whether  
444 post-test performance was influenced by training group (WL, WMT or SAT) whilst adjusting  
445 for pre-test performance. Coding dummy variables allowed us to compare the effects of the  
446 interventions (i.e., WMT compared to WL and SAT, and SAT compared to WL and WMT)  
447 in a single analysis. This regression approach is a stricter test of training gains than standard  
448 ANOVAs because interactions in the ANOVA can be at least partly driven by pre-training  
449 differences. For completeness repeated measures ANOVAs were also carried out, these  
450 showed essentially the same pattern of results as the regression analyses and are not reported  
451 here. In addition to the regression approach, paired sample t-tests were carried out to examine  
452 whether post-scores differed significantly from pre-scores for each of the groups. For several  
453 transfer measures, Figure 3 shows post-test score minus pre-test score for each of the three  
454 groups.

455 *Measures of attentional functions:* Turning first to spatial bias (see Figure 4a), the regression  
456 indicated that between them, ‘pre-test score’ and ‘experimental group’ predictors explained  
457 75.5% of the variance ( $R^2=0.76$ ,  $F(3, 26)= 26.74$ ,  $p<0.001$ ). Whilst as might be expected,  
458 ‘pre-test score’ was a significant predictor ( $\beta=0.89$ ,  $p<0.001$ ), SAT (compared to a  
459 combination of WL and WMT) was also a significant predictor ( $\beta=-0.41$ ,  $p=0.002$ ), whereas  
460 no such effect was seen for WMT (compared to a combination of WL and SAT) ( $\beta=-0.18$ ,  
461  $p=0.15$ ). In addition to this, paired samples t-tests indicated a significant change in bias score  
462 between pre and post testing in the SAT group ( $t=-3.03$ ,  $df=9$ ,  $p<0.05$ ), no such change was  
463 observed in either the WMT group ( $t=-1.27$ ,  $df=9$ ,  $p=0.24$ ), or WL ( $t=1.44$ ,  $df=9$ ,  $p=0.19$ ).  
464 Thus SAT alone appeared to have a beneficial impact on spatial awareness.

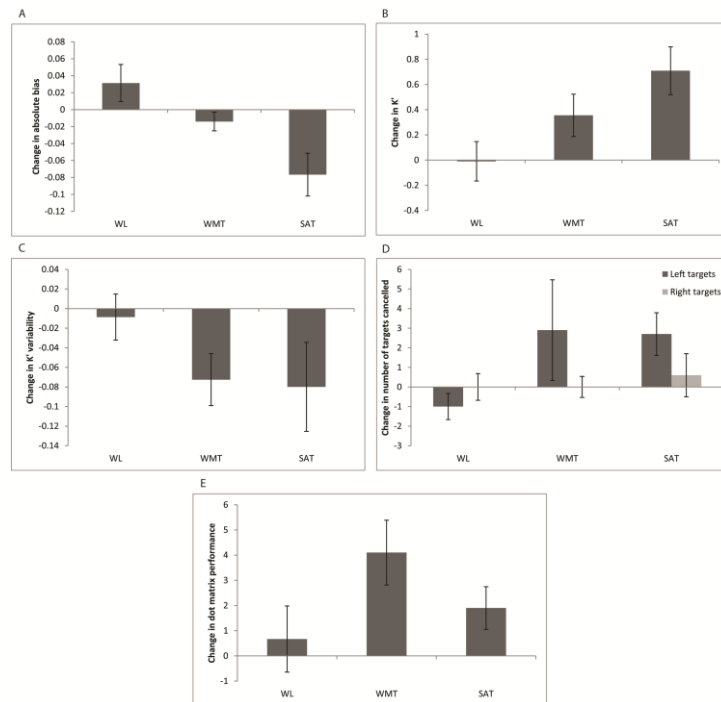

465

466 Figure 4. Mean ( $\pm$  S.E) change in performance from pre-test to post-test for the experimental  
467 measures in each of the groups. Plots show performance for; A. change in TVA absolute bias, B.  
468 change in K', C., K variability, D. change in number of targets cancelled by side on the star  
469 cancellation task and E. change in Dot Matrix performance.

470 As our SAT was focussed on improving selective attention it may be expected that any  
471 attentional affects on awareness may stem from improvements in top-down control ( $\alpha'$ ).  
472 However, the regression indicated that between them, 'pre-test score' and 'experimental  
473 group' predictors explained less variance than we saw with spatial bias ( $R^2=0.57$ ,  $F(3, 26)=$   
474  $11.54$ ,  $p<0.001$ ) and 'pre-test score' was the only significant predictor ( $\beta=0.74$ ,  $p<0.001$ ).

475 The K' capacity measure might have been expected to have been influenced by both WMT  
476 and SAT training. The regression indicated that between them, 'pre-test score' and  
477 'experimental group' predictors explained 68.7% of the variance ( $R^2=0.69$ ,  $F(3, 26)= 19.02$ ,  
478  $p<0.001$ ) (Figure 4b). In line with our prediction it was found that 'pre-test score' ( $\beta=0.77$ ,  
479  $p<0.001$ ), SAT ( $\beta=-0.38$ ,  $p<0.01$ ), and to a lesser extent WMT ( $\beta=-0.28$ ,  $p<0.05$ ) were all

480 significant predictors of post-test score. Paired samples t-tests indicated that K' values were  
481 significantly improved in the SAT ( $t=3.73$ ,  $df=9$ ,  $p<0.01$ ) group post training, an effect that  
482 reached near significance in the WMT ( $t=2.11$ ,  $df=9$ ,  $p=0.06$ ) group, but was absent in the  
483 WL( $t=0.06$ ,  $df=9$ ,  $p=0.95$ ).

484 It is worth noting that K' and spatial bias might not be independent. To take an extreme  
485 example, if a participant reports all 6 letters, spatial bias must be zero. To address this  
486 potential non-independence we re-ran the spatial bias regression including 'pre- post-test K'  
487 change' as a predictor of pre-post-training bias change. This indicated that, between them,  
488 'pre-test score', 'change in K' and 'experimental group' predictors explained 76.1% of the  
489 variance ( $R^2=.761$ ,  $F(25,29)=19.89$ ,  $p<0.001$ ). Whilst 'pre-test bias' ( $\beta=0.87$ ,  $p<0.001$ ) was  
490 a significant predictor, critically, 'change in K' was not ( $\beta=0.09$ ,  $p=0.49$ ). Importantly,  
491 despite this very stringent test, SAT ( $\beta=-.36$ ,  $p<0.05$ ) remained a significant predictor, but not  
492 WMT ( $\beta=-.16$ ,  $p=0.20$ ). This strongly suggests that the effects of improved spatial bias  
493 following SAT were not simply an artefact of improved capacity.

494 We were also able to use 6T variability (Variability) as a measure of the consistency with  
495 which attention was maintained (Figure 4c). Despite our training not being specifically  
496 designed to develop this skill, 'pre-test score' and 'experimental group' predictors still  
497 explained 36.8% of the variance ( $R^2=0.37$ ,  $F(3, 26)=5.05$ ,  $p<0.01$ ) in post-test Variability.  
498 This is driven by both 'pre-test score' ( $\beta=0.51$ ,  $p<0.005$ ), and WMT ( $\beta=-0.37$ ,  $p<0.05$ ). Here,  
499 no effect of SAT was seen ( $\beta=-0.20$ ,  $p=0.28$ ). Paired samples t-tests indicated that Variability  
500 was significantly reduced in the WMT ( $t=2.73$ ,  $df=9$ ,  $p<0.05$ ) group post training, but such  
501 reduction was not observed in the SAT ( $t=1.76$ ,  $df=9$ ,  $p=0.11$ ) or the WL( $t=0.37$ ,  $df=9$ ,  
502  $p=0.72$ ) groups.



503 Analysis of the standard clinical measures of attention, star cancellation, line bisection, prior  
504 entry, lateral reaction time and line bisection were carried out despite most patients showing  
505 no significant clinical impairments on these tasks at pre-test (patients had chronic lesions and  
506 were selected on the basis of lesion location rather than clinical symptoms). As exemplified  
507 by the star cancellation data (see Figure 4d) an encouraging pattern of results was observed  
508 post-training, with increased awareness on left sided items, but this failed to reach statistical  
509 significance.

510 *Working Memory Measures:* Change in performance on a measure of visuo-spatial capacity,  
511 the AWMA Dot Matrix task is shown in Figure 4e. The regression indicated that between  
512 them, ‘pre-test score’ and ‘experimental group’ predictors explained 62.8% of the variance  
513 ( $R^2=0.63$ ,  $F(3, 26)= 14.09$ ,  $p<0.001$ ). In line with our prediction ‘pre-test score’ ( $\beta=0.73$ ,  
514  $p<0.001$ ) and WMT ( $\beta=0.30$ ,  $p<0.05$ ) were significant predictors of post- test score, while  
515 SAT was not ( $\beta=-0.09$ ,  $p=0.59$ ). Paired samples t-tests indicated that the number of locations  
516 correctly recalled was significantly increased in the WMT group ( $t=3.19$ ,  $df=9$ ,  $p<0.05$ ) post-  
517 training, an effect that reached near significance in the SAT group ( $t=2.24$ ,  $df=9$ ,  $p=0.05$ ), but  
518 was absent in WL ( $t=0.51$ ,  $df=8$ ,  $p=0.63$ ). Performance on the Spatial Recall task of the  
519 AWMA did not vary by training condition in the same way. Although a significant  
520 regression ( $R^2=0.55$ ,  $F(3, 26)= 9.03$ ,  $p<0.001$ ) was observed, the only significant predictor of  
521 post-test performance was ‘pre-test score’ ( $\beta=0.70$ ,  $p<0.001$ ) with neither WMT ( $\beta=0.24$ ,  
522  $p=0.15$ ) nor SAT ( $\beta=0.04$ ,  $p=0.85$ ) acting as significant predictors. Despite this, paired-  
523 sample t-tests indicated that the WMT group showed a significant improvement in  
524 performance between pre- and post-test ( $t=2.49$ ,  $df=9$ ,  $p<0.05$ ) whereas neither SAT ( $t=0.48$ ,  
525  $df=8$ ,  $p=0.65$ ) nor WL ( $t=0.15$ ,  $df=8$ ,  $p=0.88$ ) showed such effects.

526 *Measures of disability:* Changes in disability rating for each of the domains of the EBIQ are  
527 shown in figure 5. To limit the number of statistical tests conducted, formal analysis was  
528 limited to the two most pertinent domains; core symptoms (a global measure of impairment)  
529 and cognitive symptoms. Turning first to core symptoms, regression indicated that between  
530 them, ‘pre-test score’ and ‘experimental group’ predictors explained 66.4% of the variance  
531 ( $R^2=0.66$ ,  $F(3, 26)= 19.02$ ,  $p<0.001$ ). In line with our prediction, ‘pre-test score’ ( $\beta=0.65$ ,  
532  $p<0.001$ ), WMT ( $\beta=-0.61$ ,  $p<0.001$ ), and SAT ( $\beta=-0.58$ ,  $p<0.001$ ) were all significant  
533 predictors of post-test score. Paired samples t-tests indicated that core symptoms were  
534 significantly reduced post-training in both the WMT ( $t=-5.42$ ,  $df=9$ ,  $p<0.001$ ) and the SAT  
535 ( $t=-4.38$ ,  $df=9$ ,  $p<0.005$ ) groups, but not in the WL( $t=0.77$ ,  $df=9$ ,  $p=0.46$ ). In a similar  
536 manner, a regression analysis indicated that ‘pre-test score’ and ‘experimental group’  
537 predictors explained 55.7% of the variance ( $R^2=0.56$ ,  $F(3, 26)= 10.92$ ,  $p<0.001$ ) in post-test  
538 cognitive symptoms. Paired samples t-tests indicated that cognitive symptoms were  
539 significantly reduced post training in both the WMT ( $t=-5.78$ ,  $df=9$ ,  $p<0.001$ ) and the SAT  
540 ( $t=3.41$ ,  $df=9$ ,  $p<0.005$ ) groups, but not in the WL ( $t=-1.15$ ,  $df=9$ ,  $p=0.28$ ) group.

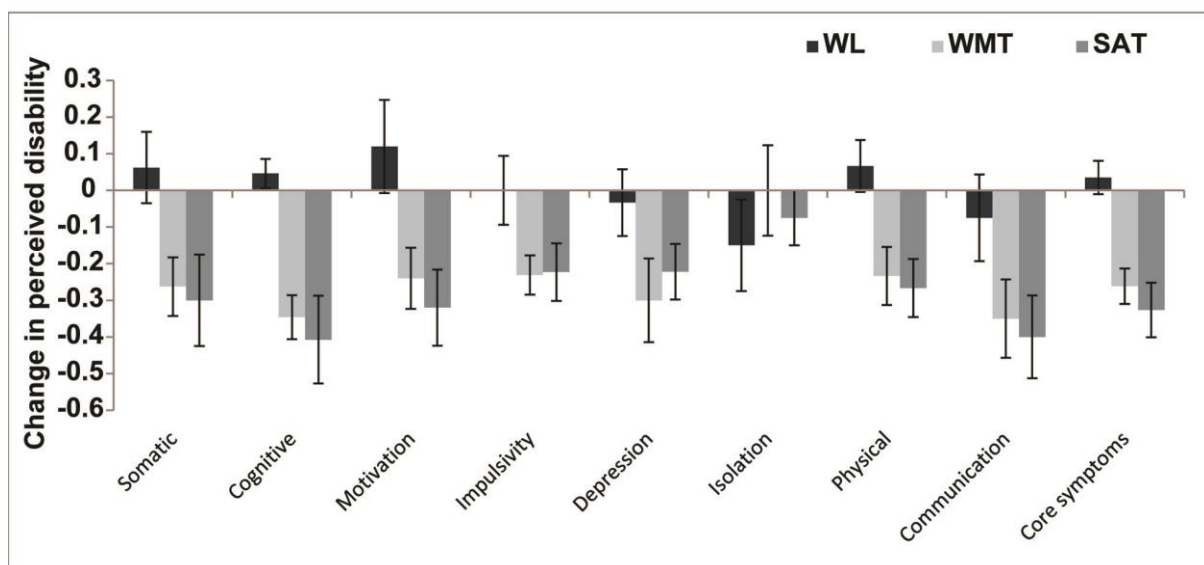

541

542 Figure 5. Change in self-reported disability as measured by the EBIQ from pre-test to post-test.

543 *What predicts reductions in disability?* A key question is whether self-reported improvements  
544 were related to objective changes in cognitive function. A regression using ‘pre-test core  
545 symptoms’, ‘change in absolute bias’, ‘change in K’, ‘change in Dot Matrix performance’  
546 and ‘change in Variability’ as predictors of pre-post test change in core symptoms indicated  
547 that these variables explained 63% of the variance ( $R^2=0.63$ ,  $F(5, 28)= 7.74$ ,  $p<0.001$ ). As  
548 may have been expected, ‘pre-test core symptom score’ was a significant predictor ( $\beta=0.44$ ,  
549  $p=0.006$ ) of change in reported core symptoms. In addition both ‘change in absolute bias’  
550 ( $\beta=0.37$ ,  $p=0.016$ ) and ‘change in Variability’ ( $\beta=0.33$ ,  $p=0.03$ ) significantly predicted  
551 change in core symptoms. This was not true for changes in K’ ( $\beta=0.03$ ,  $p=0.83$ ) or Dot  
552 Matrix performance ( $\beta=-0.20$ ,  $p=0.15$ ).

553 *How does training improvement influence transfer?* The specificity of some of the  
554 improvements in working memory and attention tasks may be indicative of task or domain  
555 specific training. If this were the case, we might expect that the extent of the training gain  
556 would be predictive of the extent of improvement in closely related outcome tests and less  
557 predictive of change on more divergent measures. To compare training rates in the two  
558 training groups we standardised the rate parameter  $\delta y/\delta x$ , ( $Z\delta y/\delta x$ ), and then generated in  
559 interaction term based on the product of the de-meaned group and the newly standardised rate  
560 parameter. Regressions were carried to examine significant predictors of change in  
561 performance between pre- and post-test on the basis of: ‘pre-test score’, ‘intervention’ (WMT  
562 vs. SAT), ‘rate of improvement on training’ ( $Z\delta y/\delta x$ ), or the ‘interaction between group and  
563 improvement rate’ ( $Gp*Z\delta y/\delta x$ ). Turning first to change in Dot Matrix performance, the  
564 regression indicated that between them, ‘pre-test Dot Matrix score’, ‘intervention’,  $Z\delta y/\delta x$   
565 and  $Gp*Z\delta y/\delta x$  predictors explained 70.6% of the variance ( $R^2=0.71$ ,  $F(4, 12)= 7.21$ ,  
566  $p<0.005$ ). ‘Training type’ ( $\beta=0.35$ ,  $p<0.05$ ), ‘training improvement’ ( $Z\delta y/\delta x$ ;  $\beta=-0.61$ ,

567  $p < 0.05$ ), and 'Training type x training improvement' ( $G_p * Z\delta y / \delta x$ ;  $\beta = 0.58$ ,  $p < 0.005$ ) were all  
568 significant predictors of change whilst 'pre-test Dot Matrix performance' was not.

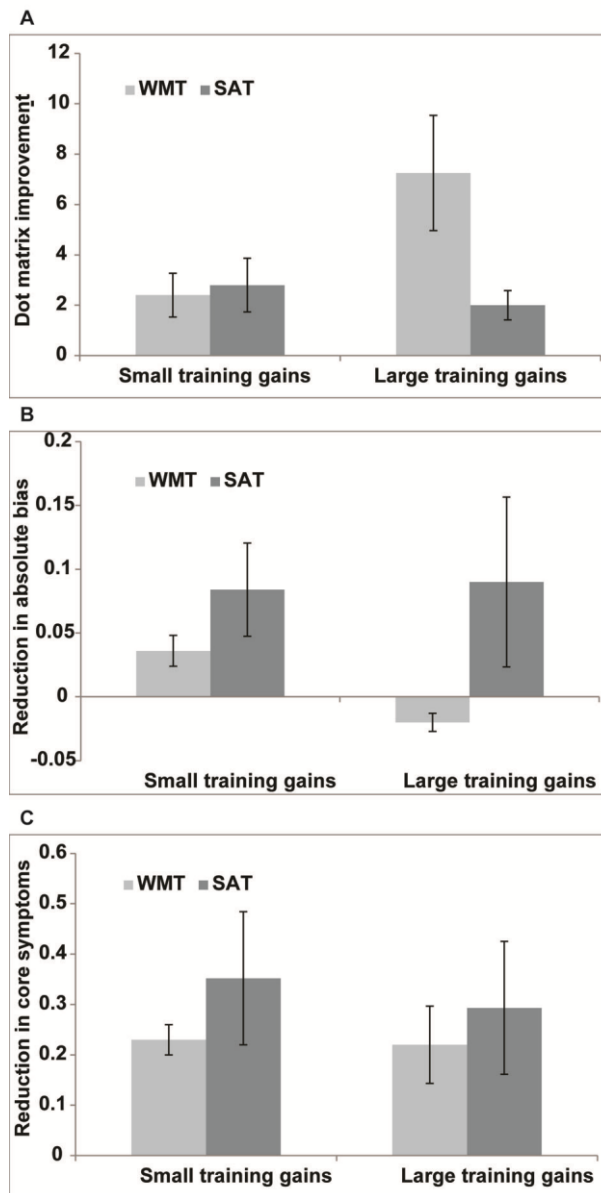

569

570 Figure 6. Mean ( $\pm$ S.E.) changes in performance for patients who made small and large training gains

571 (based on a median split) as a function of training type. A. Dot Matrix task. B. Absolute spatial bias.

572

C. EBIQ core symptoms.

573 As might be expected from this finding and shown in Figure 6a, the patients who showed the

574 biggest WMT training also showed the biggest improvements on the untrained though similar

575 Dot Matrix tasks, whereas the extent of SAT training gain did not influence Dot Matrix  
576 improvement. The pattern of results was markedly different for attentional measures. For  
577 both ‘change in absolute bias’ (see Figure 6b) and ‘change in K’, the regressors failed to  
578 significantly predict variance in change scores. As Figure 6b demonstrates, within the SAT  
579 group there was virtually no difference in change in bias scores between those who made  
580 small and large training gains. Changes in Variability and EBIQ core symptoms were  
581 significantly predicted by ‘pre-test core symptoms’, ‘training type’, ‘training gains’ and  
582 ‘training gains x training type interaction’ ( $R^2=0.62$ ,  $F(4, 12)= 4.91$ ,  $p<0.05$  for K  
583 variability, and  $R^2=0.70$ ,  $F(4, 12)= 6.88$ ,  $p<0.005$  for the EBIQ core symptoms). However,  
584 in both cases ‘pre-test score’ was the only significant predictor of change ( $\beta=0.74$ ,  $p<0.005$   
585 for K variability and  $\beta=0.89$ ,  $p<0.001$  for EBIQ core symptoms) and as Figure 6c shows, for  
586 both the WMT and SAT groups, similar reductions in core symptoms were reported by those  
587 with relatively small and large training gains.

## 588 Discussion

589 This exploratory proof-of-concept study examined whether two forms of training aimed at  
590 improving attention would lead to improvements in untrained outcome measures and self-  
591 reported disability in individuals with chronic brain lesions. A good level of compliance and  
592 approximately equivalent exposure to training between the groups allowed us to realistically  
593 assess objective benefits and examine whether the distinct training programmes had distinct  
594 and/ or generic effects. Whilst we acknowledge the relatively modest sample sizes should be  
595 kept in mind, the study provides preliminary evidence which can inform the development of  
596 future studies in clinical samples, for whom, the rigours of the extensive experimental  
597 assessments may not be appropriate.

### 598 *Distinct training effects*

599 Participants who trained on the commercially available WMT showed greater improvements  
600 than SAT and WL participants on the Dot Matrix working memory outcome measure. Such  
601 ‘near transfer’ of training gains has been observed in other populations [44,28]. Indeed  
602 improvement in Dot Matrix performance was strongly predicted by the extent of training  
603 gains made by the WMT group, pointing to learning of specific task related strategies for  
604 spatial span. Given that improvements beyond a narrow training context are a pre-requisite  
605 for any likely transfer to everyday activities, but that previous work [45] has shown that even  
606 these specific training activities do not always transfer to even closely related tasks, the  
607 current finding is encouraging. It suggests that patients can effectively apply memory related  
608 strategies developed in training to very closely related tasks. There was some evidence of  
609 improvement on the more complex Spatial Recall task in the WMT group; however, WMT  
610 was not found to disproportionately influence post-test Spatial Recall relative to SAT and  
611 WL suggesting that transfer effects to more distantly related memory tasks may be relatively  
612 small, and questioning the generic advantage of such interventions.

613 Perhaps of greater interest, however, are the improvements seen in the SAT participants  
614 across a wider variety of attentional parameters, on paradigms that appear quite different  
615 from the trained tasks and which are less dependent upon the extent of the improvements  
616 made on the training tasks. SAT participants disproportionately improved, relative to those  
617 in WMT and WL conditions, in their ability to take in more information ‘at a glance’ (K’)  
618 from brief displays and in the reduction of spatial bias (of which there were also hints in the  
619 clinical measures). The first is plausibly linked to differences in the training tasks. In WMT  
620 participants typically monitor sequences in which a single event occurs at any one time. In  
621 contrast, solving the problems presented in SAT involved taking in an increasing amount of  
622 visual information. Encouragingly, improving this capacity in a particular context during  
623 training led to attentional improvements that participants were able to effectively utilize in

624 different contexts. It is possible that this practised distribution of attention also underpinned  
625 the reduction in spatial bias. However, at least in the context of unilateral spatial neglect,  
626 even explicit training of visual scanning *per se* has often proved of limited generalised  
627 efficacy [46]. Another possibility, alluded to in the introduction, is that the reduction in  
628 spatial bias is a consequence of generally improved attentional ‘tone’ – a relatively alert state  
629 in which relevant information from across space is better prioritized. It has previously been  
630 shown that fluctuations in alertness from stimulant medication, loud tones, time-on-task, and  
631 sleep onset can impact on patients’ and healthy participants’ relative awareness for  
632 information on the left and right sides of space [35,18,20]. Anecdotally, both SAT and WMT  
633 patients appeared more awake and engaged after 4 weeks of regular, monitored cognitive  
634 activity with direct feedback. Whilst improvements in our proxy of alertness (TVA  
635 performance variability) were actually greater on average for the SAT than WMT groups, the  
636 substantial variability across SAT participants meant that this change failed to reach  
637 statistical significance (Figure 4c). Variability scores and change-in-variability scores tend,  
638 by their nature, to be somewhat unreliable as noise from the underlying measures is summed  
639 and further work is required in operationalizing ‘alertness’ and understanding mechanisms of  
640 change.

#### 641 *Generic effects*

642 In addition to improvements that were specific to WMT or SAT, more general positive  
643 effects of training were observed, particularly a marked reduction in self-reported disability  
644 across both training groups. Importantly these reductions were significantly influenced by  
645 improved spatial bias and reduced variability in performance, suggesting a link of self-  
646 perception to measurable changes in attentional functions. Interestingly, improvements in  
647 WM span did not significantly influence self-reports in the same way. If this finding is

648 replicated one possibility is that SAT practice indeed produces deeper or faster generalised  
649 changes for everyday cognition than WMT. Various accounts can be proposed for such an  
650 effect. Firstly, previous studies have suggested that poor attentional functioning is  
651 particularly associated with high levels of disability and poor outcome [7,8]. Hence change  
652 in these capacities may also produce more generalised effects. Secondly, gains in WMT may  
653 be disproportionately achieved via strategy development (see similar findings in Alzheimer's  
654 Disease, [47]) rather than underlying capacity, and as our data on transfer to other WM tasks  
655 suggest, strategy may be less easily generalised to different contexts. Other possibilities are  
656 that the greater effects of SAT on everyday function relates to the intentional recruitment of  
657 predominantly right-hemisphere patients in our sample (for whom attention deficits may be  
658 the primary cause of issues with activities of everyday living), or SAT being perceived as  
659 more relevant and hence being more influential over self-report.

660 Somewhat unexpectedly, as discussed, WMT was linked with significant reductions in  
661 performance variability on the TVA attention measures. If reliable, such transfer to a  
662 seemingly unrelated task is particularly striking given some previous literature suggesting  
663 WMT gains are restricted to near transfer to very similar span tasks [28]. However, it is not  
664 implausible to imagine how repeated practice of monitoring increasing sequences of spatial  
665 of verbal material for subsequent recall, during which even a brief lapse could prove  
666 disastrous for the entire trial, could progressively shape such consistent engagement. Along  
667 these lines, studies in the Behavioural Activation literature (encouraging patients to schedule  
668 and participate in rewarding, stimulating activity) suggests that engagement in mentally  
669 stimulating activities may help to improve alertness [48]. It is possible, therefore, that  
670 providing a daily structure within which patients were helped to focus on a cognitively  
671 demanding task for a relatively prolonged time may be sufficient to help improve alertness,  
672 perhaps irrespective of the precise demands of that training.



673 *Appropriateness of home-based computer training for patients*

674 The potential efficacy of cognitive training batteries to improve outcome has been vigorously  
675 debated in recent times, in both healthy adults and the developmental literature, with many  
676 suggesting that improvements may be short lived and fail to generalise to meaningful  
677 improvements in everyday functioning [49,29,30]. Our data showing reductions in self-  
678 reported disability related to improvements in attentional functions suggest this may not be  
679 the case in stroke patients. As discussed, there are plausible reasons why this population may  
680 benefit from training in a way that the developmental population may not. Providing some  
681 structure, focus and stimulation, as well as clear feedback to help them learn, may be critical  
682 to reductions in disability. Whilst these aspects of training are already in place in a school  
683 environment, many patients receive little input from clinical services and lack structure or  
684 focus to their day. Along these lines, positive effects of online training on both cognitive  
685 function and activities of daily living have been observed in healthy older adults [50].

686 The success of any intervention is dependent not only upon the potential for improvement  
687 following treatment, but also upon how practical and tolerable it is for patients. Here patients'  
688 ability to cope with navigating to websites, logging in etc. was good and attitudes to both  
689 interventions were generally positive, with a good proportion of patients feeling it was  
690 worthwhile continuing after the study. In accordance with this, despite the time commitment  
691 of the study, drop-out rates were very low. A caveat is that this sample was recruited from a  
692 panel of individuals who have already indicated that they are motivated to take part in  
693 research. It remains to be seen whether such good compliance would be seen in an unselected  
694 population of stroke patients.

695 *Implications and future directions*

696 The results so far indicate some specific effects of the two types of training and some  
697 generally positive effects from both compared to WL. The specific training effects are well  
698 controlled in terms of exposure to training, interaction with the experimenter and the  
699 knowledge of being engaged in training hypothesised to be helpful. However, interpretation  
700 of the more general effects, is limited by reduced stimulation in the WL and potential  
701 expectancy effects. To a degree this is offset by the finding that reductions in spatial bias and  
702 improved K' variability over the course of the study predicted changes in self-reported  
703 disability, suggesting that improvements in attentional functioning could be key to reducing  
704 disability. Of course the reverse causality also remains a possibility. An active and plausible  
705 control condition hypothesised not to be beneficial is required to clarify these issues.

706 It is generally accepted that the majority of spontaneous recovery occurs within the first six  
707 months after stroke [51,52] and it is therefore perhaps surprising we saw such extensive  
708 training effects on average 8 years post-injury. Whether training gains in the chronic phase  
709 may be more attributable to strategy development than underlying recovery remains an  
710 important topic of investigation.

711 In summary, our study provides evidence that cognitive training is feasible in stroke patients,  
712 and can lead to both specific improvements in cognitive functions and more general  
713 reductions in self-reported disability. Further work is required to examine whether such  
714 effects can be replicated in a larger sample.

## 715 Acknowledgements

716 This work could not have been carried out without the willingness and effort of our patients  
717 and their families.

718

## 719 References

- 720 [1] Saka Ō, McGuire A, Wolfe C. Cost of stroke in the United Kingdom. *Age and Aging*, 2009; 38: 27-  
721 32.
- 722 [2] Stapleton T, Ashburn A, Stack E. A pilot study of attention deficits, balance control and falls in the  
723 subacute stage following stroke. *Clinical Rehabilitation*, 2001;15: 437-44.
- 724 [3] Barker-Collo S, Feigin VL, Parag V, Lawes CMM. Auckland .Stroke Outcomes Study Part 2: cognition  
725 and functional outcomes 5 years poststroke. *Neurology*, 2010; 75: 1608-1618.
- 726 [4] Hyndman D, Ashburn A. People with stroke living in the community: attention deficits, balance,  
727 ADL ability and falls. *Disability and Rehabilitation*, 2003; 25:817-822.
- 728 [5] Robertson IH, Ridgeway V, Greenfield E, Parr A. Motor recovery after stroke depends on intact  
729 sustained attention: A 2 year follow-up study. *Neuropsychology*, 1997;11: 290-295.
- 730 [6] Geranmayeh F, Brownsett SLE, & Wise RJS. Task-induced brain activity in aphasic stroke patients:  
731 what is driving recovery? *Brain*, 2014; 137:2632–2648.
- 732 [7] Jehkonen M, Laihosalo M, Keetuenen JE. Impact of neglect on functional outcome after stroke: A  
733 review of methodological issues and recent research findings. *Restorative Neurology and*  
734 *Neuroscience*. 2006;24: 209-215.
- 735 [8] Katz N, Hartman-Maeir A, Ring H, Sorojer N. Functional disability and rehabilitation outcome in  
736 right hemisphere damaged patients with and without unilateral spatial neglect. *Archives of Physical*  
737 *Medicine and Rehabilitation*, 1999; 80: 379-384.
- 738 [9] Rossetti Y, Rode G, Pisella L, Farné A, Li L, Boisson D. Prism adaptation to a rightward optical  
739 deviation rehabilitates left hemispatial neglect. *Nature*. 1998;395: 166-9.

- 740 [10] Rossi PW, Kheyfets S, Reding MJ. Fresnel prisms improve visual perception in stroke patients  
741 with homonymous hemianopia or unilateral visual neglect. *Neurology*, 1990;40: 1597-1597.
- 742 [11] Luukainen-Markkula R, Tarkka IM, Pitkänen K, Sivenius J, Hämäläinen H. Rehabilitation of  
743 hemispatial neglect: a randomized study using either arm activation or visual scanning training.  
744 *Restorative neurology and neuroscience*, 2009; 27: 663.
- 745 [12] Bowen A, Hazelton C, Pollock A, Lincoln NB. Cognitive rehabilitation for spatial neglect following  
746 stroke. The Cochrane Library. 2013.
- 747 [13] Robertson IH, Manly T, Beschin N, Daini R, Haeske-Dewick H, Homberg V. et al Auditory  
748 sustained attention is a marker of unilateral spatial neglect. *Neuropsychologia*, 1997;35: 1527–1532.
- 749 [14] Duncan J, Bundesen C, Olson A, Humphreys G, Chavda S, Shibuya H. Systematic analysis of  
750 deficits in visual attention, *Journal of Experimental Psychology, General*. 1999;28: 450-478.
- 751 [15] Peers PV, Ludwig CJH, Rorden C, Cusack R, Bonfiglioli C, Bundesen C, et al. Attentional functions  
752 of parietal and frontal cortex. *Cerebral Cortex*, 2005;15: 1469-1484.
- 753 [16] Habekost T, Rostrup E, Persisting asymmetries of vision after right side lesions.  
754 *Neuropsychologia*, 2006; 44: 876-895.
- 755 [17] Corbetta M, Shulman GL. Control of goal-directed and stimulus-driven attention in the brain,  
756 *Nature Reviews Neuroscience*. 2002; 3: 201-15.
- 757 [18] George MS, Mercer JS, Walker R, Manly T. A demonstration of endogenous modulation of  
758 unilateral spatial neglect: The impact of apparent time pressure on spatial bias, *JINS*, 2008; 14: 33-  
759 41.

- 760 [19] Gorgoraptis N, Mah YH, Machner B, Singh-Curry V, Malhotra P, Hadji-Michael M, et al. The  
761 effects of the dopamine agonist rotigotine on hemispatial neglect following stroke. *Brain*, 2012; 135:  
762 2478-91.
- 763 [20] Bareham CA, Manly T, Pustovaya OV, Scott SK, Bekinschtein TA. Losing the left side of the world:  
764 rightward shift in human spatial attention with sleep onset. *Sci Rep*. 2014;28: 5092.
- 765 [21] Bundesen C. A theory of visual attention. *Psychological Review*. 1990; 97: 523-547.
- 766 [22] Sturm W, Fimm B, Cantagallo A, Cremel N, North P, Passadori A, et al. Specific computerized  
767 attention training in stroke and traumatic brain-injured patients: a European multicenter efficacy  
768 study, *Zeitschrift Für Neuropsychologie*, 2003;14: 283-292.
- 769 [23] Westerberg H, Jacobaeus H, Hirvikoski T, Clevberger P, Ostensson ML, Bartfai A, et al.  
770 Computerized working memory training after stroke- a pilot study. *Brain Injury*, 2007; 21: 21-29/
- 771 [24] Johansson B, Tornmalm M. Working memory training for patients with acquired brain injury:  
772 effects in daily life. *Scandinavian Journal of Occupational Therapy*, 2012; 19: 176-183.
- 773 [25] Baddeley AD, & Hitch G. Working memory. *Psychology of Learning and Motivation*, 1974;8: 47-  
774 89.
- 775 [26] Astle DE, Barnes JJ, Baker K, Colclough GL, Woolrich MW. Cognitive training enhances intrinsic  
776 brain connectivity in childhood. *J Neurosci*. 2015;35:6277-6283.
- 777 [27] Barnes JJ, Nobre AC, Woolrich MW, Baker K, & Astle DE. Training Working Memory in Childhood  
778 Enhances Coupling between Frontoparietal Control Network and Task-Related Regions. *Journal of*  
779 *Neuroscience*. 2016;36: 9001-9011.

- 780 [28] Dunning D, Holmes J, Gathercole SE. Does working memory training lead to generalized  
781 improvements in children with low working memory? A randomized controlled trial. *Developmental*  
782 *Science*, 2013;16: 915-925.
- 783 [29] Melby-Lervåg M, & Hulme C. Is working memory training effective? A meta-analytic review.  
784 *Developmental psychology*, 2013;49:270.
- 785 [30] Roberts G, Quach J, Spencer-Smith M, Anderson PJ, Gathercole S, Gold L. et al. Academic  
786 outcomes 2 years after working memory training for children with low working memory: a  
787 randomized clinical trial. *JAMA pediatrics*, 2016;170: e154568-e154568.
- 788 [31] Ishihara S. Tests for Colour-Blindness. Tokyo, Japan. Kanehara Shuppan Co., Ltd. 1978.
- 789 [32] Nelson HE. National Adult Reading Test. Windsor, UK: NFER-Nelson.1982.
- 790 [33] Institute for Personality and Ability Testing . Measuring Intelligence with the Culture Fair  
791 Tests.1973; Champaign, IL: Institute for Personality and Ability Testing.
- 792 [34] Habekost T. Clinical TVA-based studies: a general review. *Frontiers in Psychology* 2015; 6: 290.
- 793 [35] Robertson IH, Mattingley JB, Rorden C, Driver J. Phasic alerting of neglect patients overcomes  
794 their spatial deficit in visual awareness. *Nature*, 1998;395: 169-172.
- 795 [36] Stuss DT, Stethem LL, Hugenholtz H, Picton T, Pivik J, Richard MT. Reaction-Time after Head-  
796 Injury - Fatigue, Divided and Focused Attention, and Consistency of Performance. *Journal of*  
797 *Neurology Neurosurgery and Psychiatry*,1989; 52: 742–748.
- 798 [37] Wilson B, Cockburn J, Halligan P. The Behavioural Inattention Test. Titchfield, Hampshire:  
799 Thames Valley. 1987.
- 800 [38] Harvey M, Milner AD, & Roberts RC. Differential effects of line length on bisection judgements  
801 in hemispatial neglect. *Cortex*. 1995; 31: 711–722.

- 802 [39] Rorden C, Mattingley JB, Karnath HO, Driver J. Visual extinction and prior entry: impaired  
803 perception of temporal order with intact motion perception after unilateral parietal damage.  
804 *Neuropsychologia*, 1997;35: 421–33.
- 805 [40] Anderson B, Mennemeier M. & Chatterjee A. Variability not ability: Another basis for  
806 performance decrements in neglect. *Neuropsychologia*. 2000; 38:785–796.
- 807 [41] Robertson IH, Ward A, Ridgeway V, Nimmo-Smith I. The structure of normal human attention:  
808 The Test of Everyday Attention. *Journal of the International Neuropsychological Society*, 1996;2:523–  
809 534.
- 810 [42] Alloway TP. Automated Working Memory Assessment. London. Pearson Assessment. 2007.
- 811 [43] Teasdale TW, Christensen AL, Willmes K, Deloche G, Braga L, Stachowiak F, et al. Subjective  
812 experience in brain-injured patients and their close relatives: a European Brain Injury Questionnaire  
813 study. *Brain Injury*, 1997;11: 543-63.
- 814 [44] Holmes J, Butterfield S, Cormack F, van Loenhoud A, Ruggero L, Kashir L et al. Improving working  
815 memory in children with low language abilities. *Frontiers in developmental psychology*, 2015; 6: 519.
- 816 [45] Barrett AM, Buxbaum LJ, Coslett HB, Edwards E, Heilman KM, Hillis AE, et al. Cognitive  
817 rehabilitation interventions for neglect and related disorders: moving from bench to bedside in  
818 stroke patients. *J Cogn Neurosci*. 2006; 18:1223-36.
- 819 [46] Manly T. Cognitive rehabilitation for unilateral neglect: Review. *Neuropsychological*  
820 *Rehabilitation*, 2010; 12: 289-310.
- 821 [47] Huntley JD, Hampshire A, Bor D, Owen AM, Howard RJ. Adaptive working memory strategy  
822 training in early Alzheimer’s disease: randomised controlled trial. *The British Journal of Psychiatry*.  
823 2016; doi: 10.1192/bjp.bp.116.182048, 1–6.

824 [48] Thimm M, Fink GR, Kürst J, Karbe H, Sturm W. Impact of alertness training on spatial neglect: A  
825 behavioural and fMRI study. *Neuropsychologia*, 2006; 44: 1230-1246.

826 [49] Owen AM, Hampshire A, Grahn JA, Stenton R, Dajani S, Burns AS, et al. Putting brain training to  
827 the test. *Nature*, 210;465: 775-778.

828 [50] Corbett A, Owen A, Hampshire A, Grahn J, Stenton R, Dajani S, et al. The effect of an online  
829 cognitive training package in healthy older adults: an online randomized controlled trial. *JAMDA*.  
830 2015; 16: 990-997.

831 [51] Skilbeck CE, Wade DT, Hewer RL, Wood VA. Recovery after stroke. *Journal of Neurology,*  
832 *Neurosurgery & Psychiatry*, 1983;46: 5-8.

833 [52] Tilling K, Sterne JAC, Rudd AJ, Glass TA, Wityk RJ, Wolfe CDA. A new method for predicting  
834 recovery after stroke. *Stroke*, 2001; 32: 2867-2873.

835

836

837

838

839

840

841

842



843 Supporting information

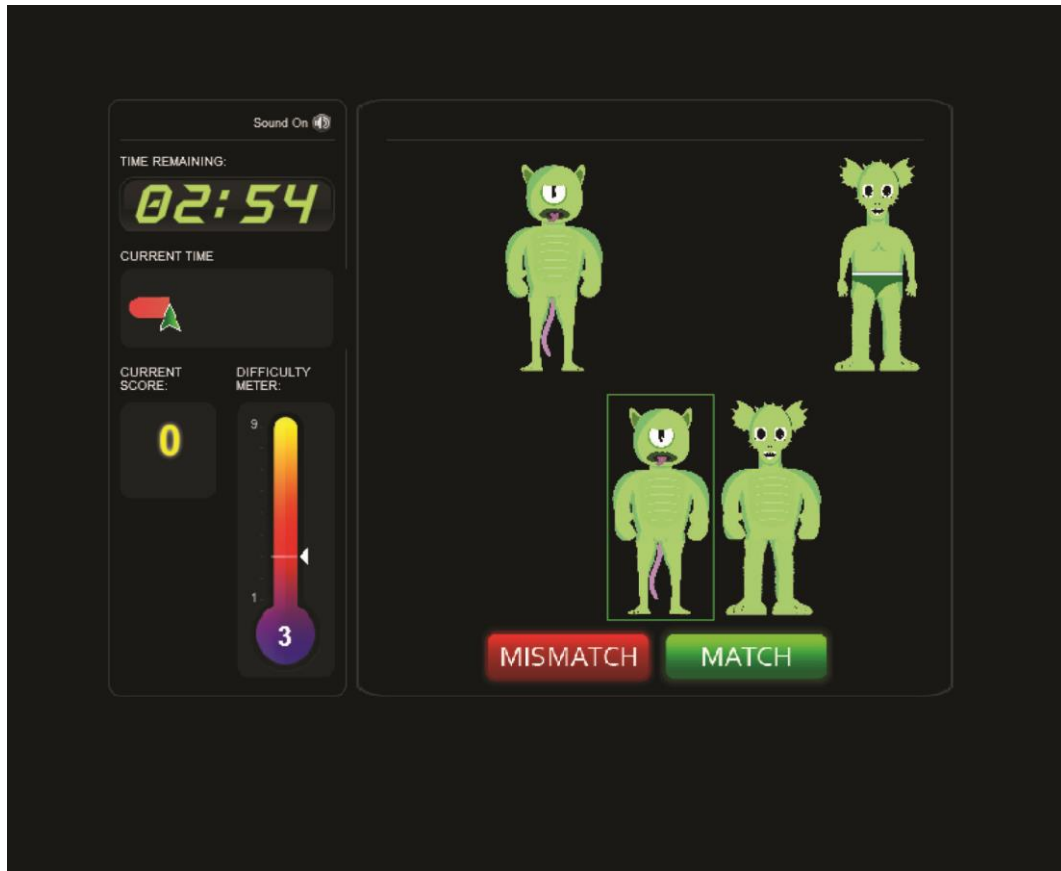

844

845 S1 Figure. An example screen from the aliens task. This example shows a 'match' trial with the

846 highlighted alien matching the one in the top left corner.

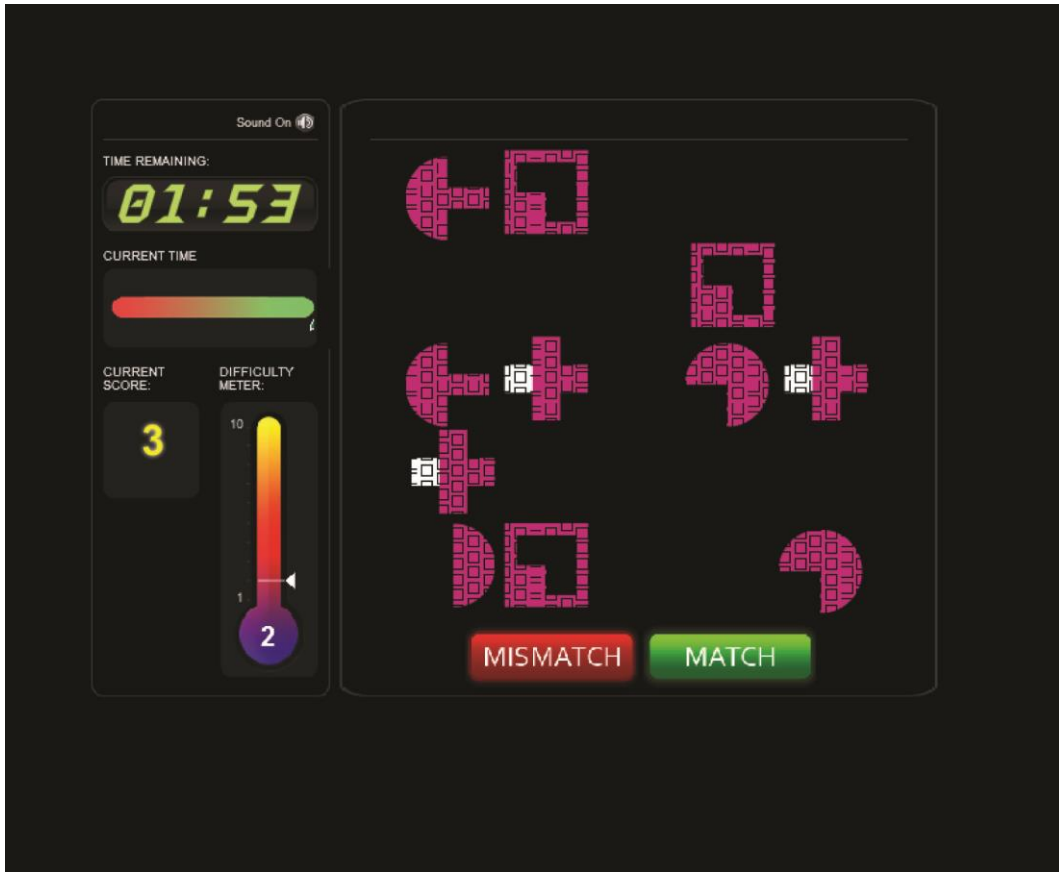

847

848 S2 Figure. An example array from the visual search task, participants had to say whether an exemplar  
849 they had just seen was present in this array.

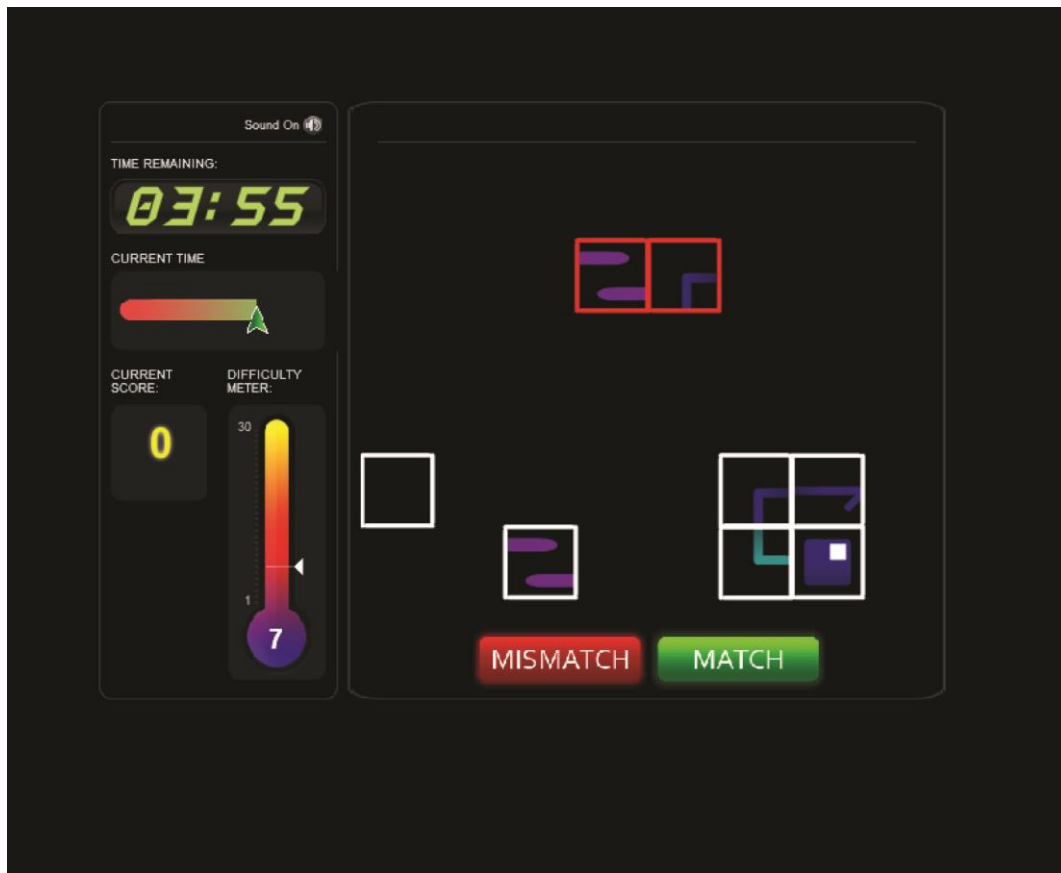

850

851 S3 Figure. An example screen from the jigsaw task. Participants decided whether the red jigsaw at  
852 the top of the screen could be made from the pieces below. This example shows a 'match'.

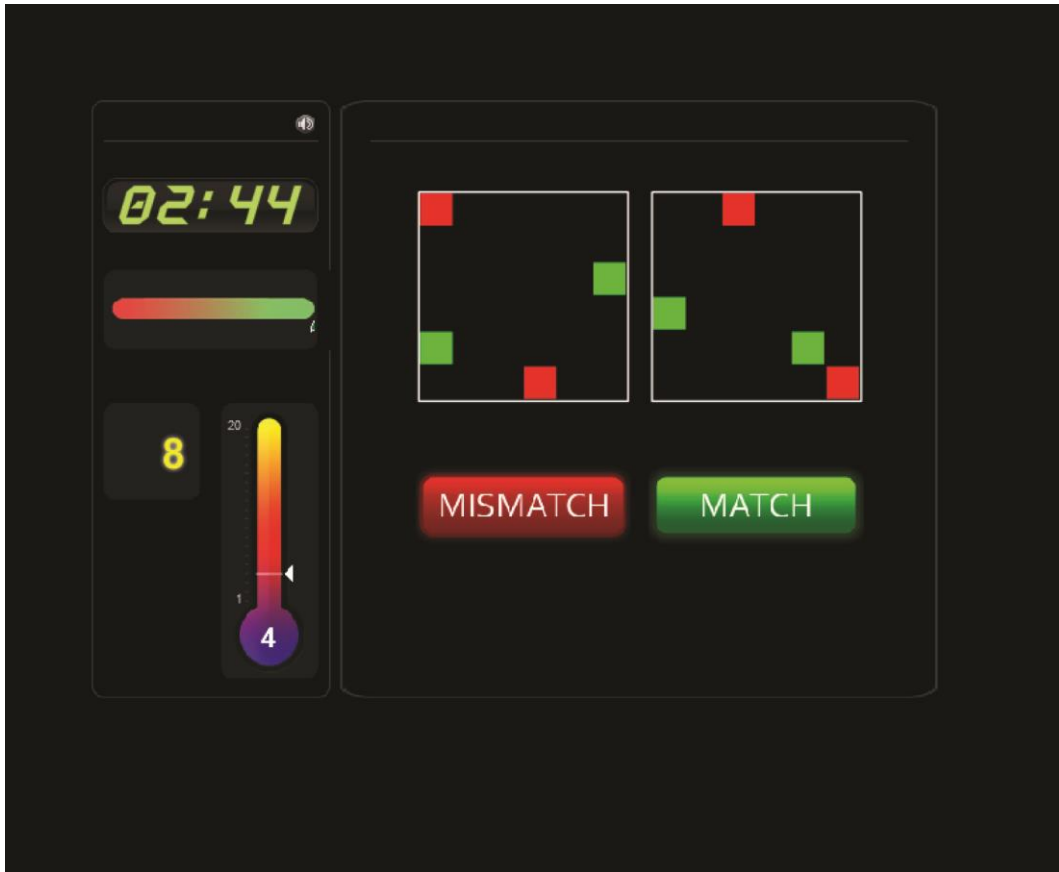

853

854 S4 Figure. An example of the rotations task. This shows a ‘mismatch’ trial as if the right sided box  
855 was rotated so that the red boxes aligned the green boxes would not align with those in the left hand  
856 box.

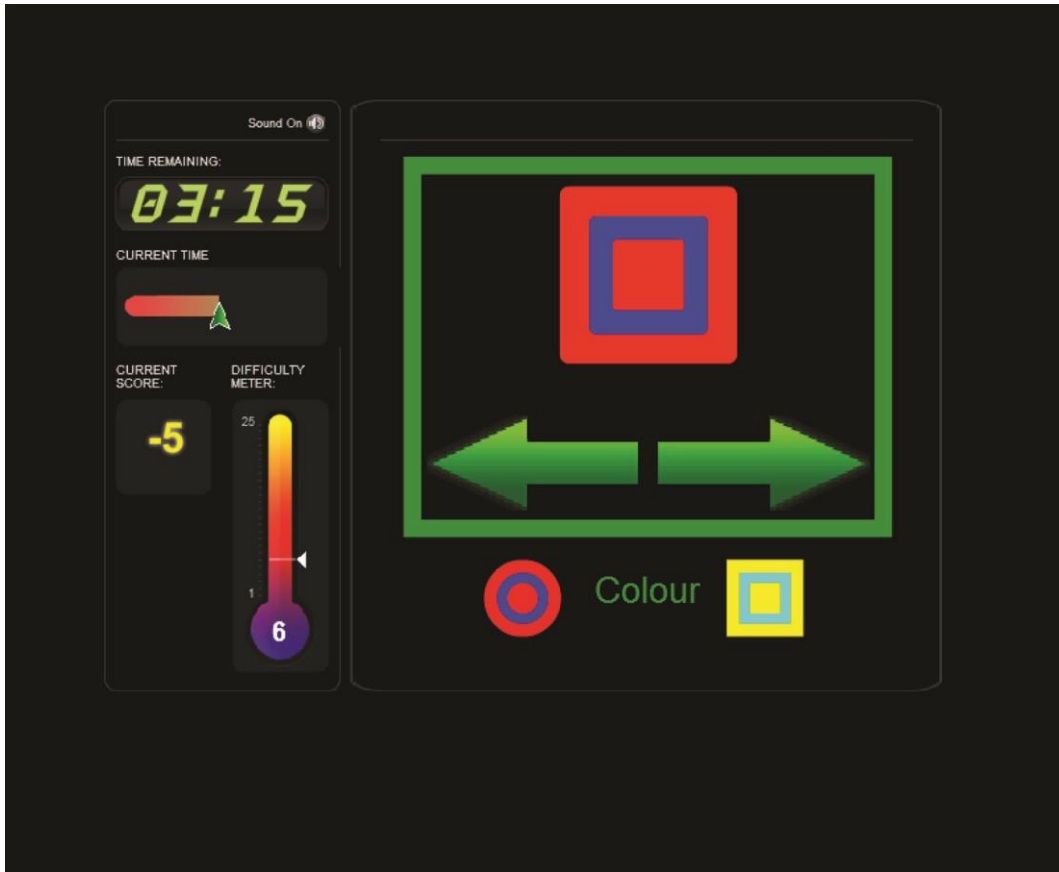

857

858 S5 Figure. An example of the button sorting task. Here the participant must sort the top stimulus by  
859 colour, the correct response would be to click on the left pointing arrow.
